# Supplementary material for: Clinicopathological characteristics and management of colitis with anti-PD1 immunotherapy alone or in combination with ipilimumab
Source: PubMed Central journal article supplement — J Immunother Cancer. 2020 Nov 24;8(2):e001488. doi: 10.1136/jitc-2020-001488 (PMC7689081; doi:10.1136/jitc-2020-001488), 2020-11-24
Supplement: jitc-2020-001488supp001.pdf [file jitc-2020-001488supp001.pdf]

Running head: CLINICOPATHOLOGICAL FEATURES OF COLITIS

Supplementary Table 1: Characteristics of total cohort ( n=118)

| <b>Characteristics</b>                     | <b>Colitis<br/>(n=118)</b><br>N(%) | <b>No colitis<br/>(n=1343)</b><br>N(%) | <b>p-value</b>   |
|--------------------------------------------|------------------------------------|----------------------------------------|------------------|
| Age, median                                | 62 (30-92)                         | 66 (16-101)                            | <b>0.02</b>      |
| Gender                                     |                                    |                                        |                  |
| Male                                       | 80 (66.2)                          | 960 (65.7)                             | 0.99             |
| Female                                     | 41 (33.8)                          | 501 (34.3)                             |                  |
| Type of Treatment                          |                                    |                                        |                  |
| Ipilimumab only                            | 3 (6.5)                            | 43 (93.5)                              | <b>&lt;.0001</b> |
| Anti PD-1 ( Nivolumab/Pembrolizumab)       | 35 (3.5)                           | 965 (96.5)                             |                  |
| Combination therapy ( Ipilimumab/Anti PD1) | 80 (14.5)                          | 473 (85.5)                             |                  |
| Endoscopy and Histopathology available     | 67 (56.8)                          | -                                      |                  |

## CLINICOPATHOLOGICAL FEATURES OF COLITIS

2

Supplementary Table 2: Characteristics of Patients with Colitis

| Characteristics                   | Overall<br>(n=115)* | PD1<br>(n=35) | IPI+PD1<br>(n=80) | P-value          |
|-----------------------------------|---------------------|---------------|-------------------|------------------|
| Age, years - median (range)       | 62 (30-92)          | 66 (37-92)    | 62 (30-78)        | <b>0.02</b>      |
| Sex, n (%)                        |                     |               |                   |                  |
| Female                            | 40 (35)             | 11 (31)       | 29 (36)           | 0.62             |
| Male                              | 75 (65)             | 24 (69)       | 51 (64)           |                  |
| Autoimmune disease history, n (%) |                     |               |                   |                  |
| No                                | 102 (89)            | 33 (94)       | 69 (86)           | 0.21             |
| Yes                               | 13 (11)             | 2 (6)         | 11 (14)           |                  |
| ECOG                              |                     |               |                   |                  |
| 0                                 | 92 (80)             | 30 (86)       | 62 (78)           | 0.31             |
| ≥1                                | 23 (20)             | 5 (14)        | 18 (22)           |                  |
| AJCC v8 staging, n (%)            |                     |               |                   |                  |
| Resected stage III <sup>†</sup>   | 17 (15)             | 9 (26)        | 8 (10)            | <b>0.01</b>      |
| Unresected stage IIIC             | 3 (2)               | 2 (6)         | 1 (1)             |                  |
| Stage IV                          | 95 (83)             | 24 (69)       | 71 (89)           |                  |
| Other irAEs, n (%)                |                     |               |                   |                  |
| Rash                              | 50 (44)             | 12 (34)       | 38 (48)           | 0.19             |
| Vitiligo                          | 23 (20)             | 7 (20)        | 16 (20)           | 1.00             |
| Pneumonitis                       | 12 (10)             | 2 (6)         | 10 (13)           | 0.27             |
| Nephritis                         | 4 (4)               | 0 (0)         | 4 (5)             | 0.18             |
| Hypophysitis                      | 12 (10)             | 2 (6)         | 10 (13)           | 0.27             |
| Thyroid disorders                 | 22 (20)             | 1 (3)         | 21 (27)           | <b>&lt; 0.01</b> |
| Hepatitis                         | 21 (19)             | 4 (13)        | 17 (22)           | 0.26             |

2

## CLINICOPATHOLOGICAL FEATURES OF COLITIS

3

|                                         |         |         |         |      |
|-----------------------------------------|---------|---------|---------|------|
| Objective response, n (%) <sup>¶¶</sup> |         |         |         |      |
| CR/PR/SD**                              | 53 (54) | 14 (54) | 39 (54) | 0.99 |
| PD                                      | 45 (46) | 12 (46) | 33 (46) |      |

\*Excludes 3 patients with ipilimumab only.

\*\*CR, complete response; PR, partial response; SD, stable disease; PD, progressive disease

<sup>¶</sup> Received treatment as adjuvant and neo-adjuvant immunotherapy

<sup>¶¶</sup> Only in advanced melanoma( stage IIIC/IV melanoma) patients

Abbreviations: ORR, objective response rate; CR, complete response; PR, partial response;

PD, disease progression

3

## CLINICOPATHOLOGICAL FEATURES OF COLITIS

4

Supplementary Table 3: Endoscopic and histopathologic features of colitis in IPI+PD1 and PD1 treated patients

| <b>Endoscopic and histopathologic characteristics</b> | <b>Overall (n=64)*</b> | <b>PD1 (n=20)</b> | <b>IPI+ PD1 (n=44)</b> | <b>P-value</b> |
|-------------------------------------------------------|------------------------|-------------------|------------------------|----------------|
| Degree of Inflammation, n(%)                          |                        |                   |                        |                |
| Absent                                                | 17 (26.6)              | 6 (30.0)          | 11 (25.0)              | 0.56           |
| Mild                                                  | 22 (34.4)              | 8 (40.0)          | 14 (31.8)              |                |
| Moderate                                              | 23 (35.9)              | 5 (25.0)          | 18 (40.9)              |                |
| Severe                                                | 2 (3.1)                | 1 (5.0)           | 1 (2.3)                |                |
| Pattern of Inflammation, n(%)                         |                        |                   |                        |                |
| Absent                                                | 17 (26.6)              | 5 (25.0)          | 15 (34.1)              | 0.60           |
| Diffuse                                               | 19 (29.7)              | 4 (20.0)          | 12 (27.3)              |                |
| Patchy                                                | 17 (26.6)              | 7 (35.0)          | 10 (22.7)              |                |
| Confluent                                             | 11 (17.2)              | 4 (20.0)          | 7 (15.9)               |                |
| Congestion, n(%)                                      |                        |                   |                        |                |
| Absent                                                | 24 (37.5)              | 9 (45.0)          | 14 (32.6)              | 0.34           |
| Present                                               | 40 (53.1)              | 11 (55.0)         | 29 (67.4)              |                |
| Erythema , n(%)                                       |                        |                   |                        |                |
| Absent                                                | 30 (46.9)              | 11(55.0)          | 19 (43.2)              | 0.38           |
| Present                                               | 34 (53.1)              | 9(45.0)           | 25 (56.8)              |                |
| Ulceration, n(%)                                      |                        |                   |                        |                |
| Absent                                                | 48 (75.0)              | 15 (75.0)         | 33 (75.0)              | 1.0            |
| Few                                                   | 7 (10.9)               | 2 (10.0)          | 5 (11.4)               |                |
| Multiple                                              | 9 (14.1)               | 3 (15.0)          | 6 (13.6)               |                |
| Mucopurulent exudate                                  |                        |                   |                        |                |
| Absent                                                | 45 (70.3)              | 15 (75.0)         | 25 (56.8)              | 0.70           |

4

## CLINICOPATHOLOGICAL FEATURES OF COLITIS

5

|                                           |           |           |           |      |
|-------------------------------------------|-----------|-----------|-----------|------|
| Mild                                      | 16 (25.0) | 5 (10.0)  | 11 (25.0) |      |
| Severe                                    | 3 (14.1)  | 0 (0.0)   | 3 (6.8)   |      |
| Crypt architecture, n(%)                  |           |           |           |      |
| Normal                                    | 39 (60.9) | 12 (60.0) | 27 (61.4) | 0.59 |
| Mild architectural change                 | 17 (26.6) | 7 (35.0)  | 10 (22.7) |      |
| Moderate diffuse/multifocal Abnormalities | 4 (6.3)   | 0 (0.0)   | 4 (9.1)   |      |
| Severe diffuse/multifocal abnormalities   | 4 (6.3)   | 1 (5.0)   | 3 (6.8)   |      |
| Mucin depletion, n(%)                     |           |           |           |      |
| Absent                                    | 34 (53.1) | 15 (75.0) | 19 (43.2) | 0.08 |
| Indefinite                                | 7 (26.6)  | 0 (0.0)   | 7 (15.9)  |      |
| Minimal                                   | 18 (28.1) | 4 (20.0)  | 14 (31.8) |      |
| Marked                                    | 5 (7.8)   | 1 (5.0)   | 4 (9.1)   |      |
| Chronic inflammatory infiltrate, n (%)    |           |           |           |      |
| No increase                               | 9 (14.1)  | 4 (20.0)  | 5 (11.4)  | 0.42 |
| Mild/equivocal increase                   | 27 (42.2) | 10 (50.0) | 17 (38.6) |      |
| Moderate increase                         | 25 (39.1) | 6 (30.0)  | 19 (43.2) |      |
| Marked increase                           | 3 (4.7)   | 0 (0.0)   | 3 (6.8)   |      |
| Pattern of inflammatory infiltrate, n (%) |           |           |           |      |
| Absent                                    | 9 (14.1)  | 4 (20.0)  | 5 (11.4)  | 0.52 |
| Focal                                     | 17 (26.6) | 6 (30.0)  | 11 (25.0) |      |
| Diffuse                                   | 38 (59.4) | 10 (50.0) | 28 (63.6) |      |
| Lamina propria eosinophils, n (%)         |           |           |           |      |
| No increase                               | 62 (96.9) | 19 (95.0) | 43 (97.7) | 0.53 |
| Mild/equivocal increase                   | 2 (3.1)   | 1 (5.0)   | 1 (2.3)   |      |

5

## CLINICOPATHOLOGICAL FEATURES OF COLITIS

6

|                                             |           |           |           |      |
|---------------------------------------------|-----------|-----------|-----------|------|
| Lamina propria neutrophils , n (%)          |           |           |           |      |
| No increase                                 | 17 (26.6) | 8 (40.0)  | 9 (20.5)  | 0.08 |
| Mild/equivocal increase                     | 24 (37.5) | 9 (45.0)  | 15 (34.1) |      |
| Moderate increase                           | 19 (29.7) | 2 (10.0)  | 17 (38.6) |      |
| Marked Increase                             | 4 (6.3)   | 1 (4.0)   | 3 (6.8)   |      |
| Apoptotic cells in epithelium, n (%)        |           |           |           |      |
| Absent                                      | 44 (68.8) | 12 (60.0) | 32 (72.7) | 0.37 |
| Occasional(<2 apoptotic bodies/10 crypts)   | 12 (18.8) | 5 (25.0)  | 7 (15.9)  |      |
| Borderline (3-6 apoptotic bodies/10 crypts) | 7 (10.9)  | 2 (10.0)  | 5 (11.4)  |      |
| Prominent (>7 apoptotic bodies/10 crypts)   | 1 (1.6)   | 1 (5.0)   | 0 (0.0)   |      |
| Erosion in epithelium, n (%)                |           |           |           |      |
| Absent                                      | 51 (79.7) | 19 (95.0) | 32 (72.7) | 0.05 |
| Present                                     | 13 (20.3) | 1 (5.0)   | 12 (27.3) |      |

6

## CLINICOPATHOLOGICAL FEATURES OF COLITIS

7

Supplementary Table 4: Features of Steroid-sensitive, Infliximab-sensitive and Infliximab-refractory groups

| Characteristics                   | Overall<br>(n=64) | Steroid<br>Sensitive<br>(n=24) | Infliximab<br>Sensitive<br>(n=31) | Infliximab<br>Refractory<br>(n=9) | P<br>value |
|-----------------------------------|-------------------|--------------------------------|-----------------------------------|-----------------------------------|------------|
| <b>Endoscopic features</b>        |                   |                                |                                   |                                   |            |
| Type of Endoscopy, n (%)          |                   |                                |                                   |                                   |            |
| Colonoscopy                       | 29 (45.3)         | 13 (54.2)                      | 11 (35.5)                         | 5 (55.6)                          | 0.30       |
| Sigmoidoscopy                     | 35 (54.7)         | 11 (45.8)                      | 20 (64.5)                         | 4 (44.4)                          |            |
| Vascularity, n(%)                 |                   |                                |                                   |                                   |            |
| Normal                            | 27 (42.2)         | 13 (54.2)                      | 12 (38.7)                         | 2 (22.2)                          | 0.39       |
| Partially absent                  | 17 (26.6)         | 6 (25.0)                       | 9 (29.0)                          | 2 (22.2)                          |            |
| Totally absent                    | 20 (31.3)         | 5 (20.8)                       | 10 (32.0)                         | 5 (55.6)                          |            |
| Congestion (oedema )              |                   |                                |                                   |                                   |            |
| Absent                            | 24 (37.5)         | 11 (45.8)                      | 11 (35.5)                         | 2 (22.2)                          | 0.44       |
| Present                           | 40 (62.5)         | 13 (54.2)                      | 20 (64.5)                         | 7 (77.8)                          |            |
| Erythema                          |                   |                                |                                   |                                   |            |
| Absent                            | 30 (46.9)         | 14 (58.3)                      | 14 (45.2)                         | 2 (22.2)                          | 0.19       |
| Present                           | 34 (53.1)         | 10 (41.7)                      | 17 (54.8)                         | 7 (77.8)                          |            |
| Ulcer                             |                   |                                |                                   |                                   |            |
| Absent                            | 48 (75.0)         | 19 (79.2)                      | 25 (80.6)                         | 4 (44.4)                          | 0.07       |
| Few                               | 7 (10.9)          | 3 (12.5)                       | 1 (3.2)                           | 3 (33.3)                          |            |
| Multiple                          | 9 (14.1)          | 2 (8.3)                        | 5 (16.1)                          | 2 (22.2)                          |            |
| <b>Histopathologic features</b>   |                   |                                |                                   |                                   |            |
| Crypt architectural changes, n(%) |                   |                                |                                   |                                   |            |
| Absent                            | 39 (60.9)         | 16 (66.7)                      | 19 (61.3)                         | 4 (44.4)                          | 0.73       |

7

## CLINICOPATHOLOGICAL FEATURES OF COLITIS

8

|                                                  |           |           |           |          |      |
|--------------------------------------------------|-----------|-----------|-----------|----------|------|
| Mild                                             | 17 (26.6) | 6 (25.0)  | 7 (22.6)  | 4 (44.4) |      |
| Moderate                                         | 4 (6.3)   | 1 (4.2)   | 3 (9.7)   | 0 (0.0)  |      |
| Severe                                           | 4 (6.3)   | 1 (4.2)   | 2 (6.5)   | 1 (11.1) |      |
| Mucin depletion,n(%)                             |           |           |           |          |      |
| Absent                                           | 34 (53.1) | 17 (70.8) | 13 (41.9) | 4 (44.4) | 0.19 |
| Indefinite                                       | 7 (10.9)  | 2 (8.3)   | 4 (12.9)  | 1 (11.1) |      |
| Minimal                                          | 18 (28.1) | 5(20.8)   | 9 (29.0)  | 4 (44.4) |      |
| Marked                                           | 5 (7.8)   | 0 (0.0)   | 5 (16.1)  | 0 (0.0)  |      |
| Pattern of inflammatory infiltrate               |           |           |           |          |      |
| Absent                                           | 9 (14.1)  | 5 (20.8)  | 3 (9.7)   | 1 (11.1) | 0.56 |
| Focal                                            | 17 (26.6) | 5 (20.8)  | 8 (25.8)  | 4 (44.4) |      |
| Diffuse                                          | 38 (59.4) | 14 (58.3) | 20 (64.5) | 4 (44.4) |      |
| Lamina propria eosinophils, n (%)                |           |           |           |          |      |
| No increase                                      | 62 (96.9) | 23 (95.8) | 30 (96.8) | 9 (100)  | 1.00 |
| Mild/equivocal increase                          | 2 (3.1)   | 1 (4.2)   | 1 (3.2)   | 0 (0.0)  |      |
| Apoptotic cells in epithelium, n (%)             |           |           |           |          |      |
| Absent                                           | 44 (68.0) | 18 (75.8) | 22 (71.0) | 4 (44.4) | 0.15 |
| Occasional(<2 apoptotic bodies/10 crypts)        | 12 (18.8) | 5 (20.8)  | 4 (12.9)  | 3 (33.3) |      |
| Borderline (3-6 apoptotic bodies/10 crypts)      | 7 (10.9)  | 1 (4.2)   | 5 (16.1)  | 1 (11.1) |      |
| Prominent (>7 apoptotic bodies/10 crypts)        | 1 (1.6)   | 0 (0.0)   | 0 (0.0)   | 1 (11.1) |      |
| Location of intraepithelial lymphocytosis, n (%) |           |           |           |          |      |
| Absent                                           | 43 (67.2) | 15 (62.5) | 21 (67.7) | 7 (77.8) | 0.39 |
| Crypt predominant                                | 12 (18.8) | 4 (16.7)  | 7 (22.6)  | 2 (22.2) |      |
| Crypt and superficial                            | 9 (14.1)  | 5 (20.8)  | 3 (9.7)   | 0 (0.0)  |      |
| Intraepithelial lymphocytosis grade              |           |           |           |          |      |

8

## CLINICOPATHOLOGICAL FEATURES OF COLITIS

9

|                         |           |           |           |          |      |
|-------------------------|-----------|-----------|-----------|----------|------|
| Absent                  | 43 (67.2) | 17 (65.4) | 21 (67.7) | 7 (77.8) | 0.65 |
| Borderline 10-20/100HPF | 13 (20.3) | 4 (15.4)  | 7 (22.6)  | 2 (22.2) |      |
| Severe >20/100 HPF      | 8(12.5)   | 5 (19.2)  | 3 (9.7)   | 0 (0.0)  |      |
| Ulceration              |           |           |           |          | 0.13 |
| Absent                  | 62 (96.9) | 23 (95.8) | 22 (71.0) | 8 (88.9) |      |
| Present                 | 2 (3.1)   | 1 (4.2)   | 9 (29.0)  | 1 (11.1) |      |

9
